# Estimate of inbreeding depression on growth and reproductive traits in a Large White pig population

Yu Zhang <sup>1</sup>, Yue Zhuo <sup>1</sup>, Chao Ning <sup>2</sup>, Lei Zhou <sup>1</sup> and Jian-Feng Liu <sup>1,\*</sup>

<sup>1</sup>National Engineering Laboratory for Animal Breeding; Key Laboratory of Animal Genetics, Breeding, and Reproduction, Ministry of Agriculture; College of Animal Science and Technology, China Agricultural University, Beijing 100193, China,

<sup>2</sup>Shandong Provincial Key Laboratory of Animal Biotechnology and Disease Control and Prevention, College of Animal Science and Technology, Shandong Agricultural University, Tai'an 271000, China

\*Corresponding author: College of Animal Science and Technology, China Agricultural University, 2 Yuanmingyuan West Road, Beijing 100193, China. Email: liujf@cau.edu.cn;

\*Corresponding author: College of Animal Science and Technology, China Agricultural University, 2 Yuanmingyuan West Road, Beijing 100193, China. Email: leiz@cau.edu.cn

## Abstract

With the broad application of genomic information, SNP-based measures of estimating inbreeding have been widely used in animal breeding, especially based on runs of homozygosity. Inbreeding depression is better estimated by SNP-based inbreeding coefficients than pedigree-based inbreeding in general. However, there are few comprehensive comparisons of multiple methods in pigs so far, to some extent limiting their application. In this study, to explore an appropriate strategy for estimating inbreeding depression on both growth traits and reproductive traits in a Large White pig population, we compared multiple methods for the inbreeding coefficient estimation based on both pedigree and genomic information. This pig population for analyzing the influence of inbreeding was from a pig breeding farm in the Inner Mongolia of China. There were 26,204 pigs with records of age at 100 kg (AGE) and back-fat thickness at 100 kg (BF), and 6,656 sows with reproductive records of the total number of piglets at birth (TNB), and the number of alive piglets at birth (NBA), and litter weight at birth. Inbreeding depression affected growth and reproductive traits. The results indicated that pedigree-based and SNP-based inbreeding coefficients had significant effects on AGE, TNB, and NBA, except for BF. However, only SNP-based inbreeding coefficients revealed a strong association with inbreeding depression on litter weight at birth. Runs of homozygosity-based methods showed a slight advantage over other methods in the correlation analysis of inbreeding coefficients and estimation of inbreeding depression. Furthermore, our results demonstrated that the model-based approach (RZooRoH) could avoid miscalculations of inbreeding and inbreeding depression caused by inappropriate parameters, which had a good performance on both AGE and reproductive traits. These findings might improve the extensive application of runs of homozygosity analysis in pig breeding and breed conservation.

**Keywords:** Large White pigs; inbreeding coefficient; inbreeding depression; ROH; SNP

## Introduction

Inbreeding refers to the mating of individuals related to each other by ancestry, which increases the frequency of homozygotes in small populations (Falconer and Mackay 1996). Inbreeding is usually used to consolidate the hereditary traits of animals and establish breeds and lines in the domestication of several species. In addition, inbreeding increases the likelihood of being homozygous for recessive deleterious mutations, ultimately leading to inbreeding depression (ID) (Charlesworth and Willis 2009). ID on the fitness of individuals, production performance, and fertility has been frequently reported in livestock (Holyoake et al. 2006; Bijlsma and Loeschcke 2012; Markus et al. 2013; Ugnivenko 2018; Gutierrez-Reinoso et al. 2020).

The degree of inbreeding is measured by the coefficient of inbreeding (F), which is defined as the probability of the 2 alleles at any locus are identical by descent (IBD; Falconer and Mackay 1996). It is traditionally estimated from the pedigree (F<sub>PED</sub>). However, pedigree-based methods only give expected probabilities of IBD

rather than their real value (Hill 1993) and are limited by inaccurate or missing pedigree information. With the extensive application of molecular genotyping technology, genomic data are widely used to estimate the inbreeding coefficient (Leutenegger et al. 2003), such as F based on the percentage of homozygous (F<sub>PH</sub>), derived from the genomic relationship matrix (F<sub>GRM</sub>; Yang et al. 2010) and the observed vs expected number of homozygous genotypes (F<sub>HOM</sub>). Compared with F<sub>PED</sub>, the above SNP-based measures could avoid the effect of genealogical error and detect ID more effectively in simulation studies (Wang 2016). Besides, long runs of homozygous genotypes, known as runs of homozygosity (ROHs), represent autozygosity (McQuillan et al. 2008). The inbreeding coefficient based on ROH (F<sub>ROH</sub>) was reported that it was more accurate for assessing individual inbreeding levels than other inbreeding coefficient estimators in recent studies (Schäler et al. 2020; Shi et al. 2020). The criteria of this rule-based method had to be optimized for different populations and the genotyping technology, but the software RZooRoH could detect ROHs easily without a predefined threshold (Bertrand et al. 2019).

Received: February 25, 2022. Accepted: May 02, 2022

© The Author(s) 2022. Published by Oxford University Press on behalf of Genetics Society of America.

This is an Open Access article distributed under the terms of the Creative Commons Attribution License (<https://creativecommons.org/licenses/by/4.0/>), which permits unrestricted reuse, distribution, and reproduction in any medium, provided the original work is properly cited.

ID was usually associated with the reduced expression of dominance effects, which was also used in genomic models to estimate dominance and epistatic genetic variance (Varona *et al.* 2018; Vitezica *et al.* 2018). This inclusion of ID could improve the predictive ability for the total number of piglets at birth (TNB) in a pig's cross-breeding program (Xiang *et al.* 2016). Accurate estimates of inbreeding and ID could also improve the efficiency of the mate allocation strategies and breeding programs (Zhang *et al.* 2015; González-Diéguez *et al.* 2019).

In pigs, many studies suggested that an increase of the inbreeding coefficient resulted in a significant reduction of reproductive traits, including the TNB, the number of alive piglets at birth (NBA), and gestation length (Farkas *et al.* 2007). In addition, the increased inbreeding negatively affected growth and production performance, such as lean meat percentage, average daily gain, and growth traits at pre- or weaning (Vigh *et al.* 2008; Gowrimanokari *et al.* 2019). More recent studies provided significant evidence that TNB was associated with ID in a Korean native pig population (Kim *et al.* 2019) and an Iberian pig population (Casellas *et al.* 2019). According to a meta-analysis of different studies, SNP-based estimates of ID were more powerful than pedigree-based estimates (Doekes *et al.* 2021). Silió *et al.* (2013) reported that the daily growth rate decreased by 0.007 kg/day and weight at 90 days decreased by 0.308 kg with a 10% increase of genomic inbreeding coefficients in Iberian pigs. For TNB and NBA, a 10% increase in  $F_{\text{HOM}}$  on chromosome 13 caused a decline of 0.121 and 0.117, respectively (Saura *et al.* 2015). However, the above studies on pigs were incomplete for lack of the application of new methods, such as  $F_{\text{ROH}}$  based on the underlying hidden Markov model. On the other hand, they were limited to small groups and lacked comprehensive comparison with multiple methods. This study aimed to compare several methods for estimating the inbreeding coefficient based on pedigree and SNP information and investigate a suitable method for estimating ID on different traits in a Large White pig population.

## Materials and methods

### Animals and phenotypes

The data were collected from a pig breeding farm in Inner Mongolia, China. The dataset contained a pedigree with 52,789 Large White pigs, of which 27,341 animals had at least 1 trait. There were 26,204 animals with growth traits and 6,656 animals with reproductive traits (21,680 records), of which 5,519 sows have both growth and reproductive phenotypes. All animals were born between 2013 and 2020.

The evaluated growth traits were age at 100 kg (AGE) and back-fat thickness at 100 kg (BF), and they were adjusted according to the National Swine Performance Recording Standards of China (Supplementary File 1). Reproductive traits included TNB, NBA, and litter weight at birth.

### Genomic data

Genotyping was conducted using an SNP chip named CAU50K, including 43,832 SNPs (The map version used for SNP positions is Sscrofa10.2). Quality control of the genotype data was implemented by PLINK (Purcell *et al.* 2007) using the criteria [marker genotype deletion rate <1%, sample genotype deletion rate <1%, minor allele frequency (MAF) >0.01, and Hardy-Weinberg Equilibrium (HWE) > 10e-4]. Finally, a total of 1,600 pigs and 35,304 SNPs on autosomes remained for subsequent analysis. There were only 1,599 pigs with both genotype and pedigree

information, of which 1,592 animals had growth phenotypes, and 1,187 sows had reproductive phenotypes (5,566 records).

### Estimation of inbreeding coefficients

The pedigree-based inbreeding coefficients with an average depth of 8.23 generations were estimated by the R package "Pedigree" (Coster 2012).  $F_{\text{PED}(\text{total})}$  was estimated from 27,341 animals with at least 1 trait. Due to missing pedigree information,  $F_{\text{PED}}$  was only estimated for the 1,599 animals with both genotype and pedigree information.

Genomic inbreeding coefficients were estimated by 4 different estimators, including the percentage of homozygous SNPs ( $F_{\text{PH}}$ ), the genomic relationship matrix ( $F_{\text{GRM}}$ ), and the observed vs expected number of homozygous genotypes ( $F_{\text{HOM}}$ ), and runs of homozygosity ( $F_{\text{ROH}}$ ). Their detailed computation strategies were as follows:

- 1)  $F_{\text{PH}}$  refers to the proportion of homozygous genotypes of all genotypes.
- 2) Genomic inbreeding coefficients derived from the genomic relationship matrix ( $F_{\text{GRM}}$ ) were calculated by GCTA soft (Yang *et al.* 2011). To explore whether pruning data for stringent MAF may decrease  $F_{\text{GRM}}$ ,  $F_{\text{GRM}2}$  were estimated from 32,840 SNPs when MAF was set at 0.05 as a comparison.
- 3)  $F_{\text{HOM}}$ , which is based on the observed vs expected number of homozygous genotypes, was estimated using PLINK soft (Purcell *et al.* 2007). The formula is  $F_{\text{HOM}} = \frac{O-E}{L-E}$ , where O is the number of observed homozygotes, E is the number expected by chance, and L is the number of genotyped autosomal SNPs. According to the PLINK software recommendation,  $F_{\text{HOM}(\text{pruned})}$  was also estimated after SNP pruning (with a sliding window of 50 SNPs, shifting the window 5 SNPs forward and removing SNPs with  $r^2 > 0.5$ ; -indep-pairwise 50 5 0.5) based on linkage disequilibrium (LD), with 11,270 SNPs remaining.
- 4)  $F_{\text{ROH}}$  was based on ROH, which was detected based on the different criteria using PLINK v1.9 and on a hidden Markov model framework using RZooRoH (Bertrand *et al.* 2019). Most studies estimated the inbreeding coefficient based on the length of ROH (McQuillan *et al.* 2008), which was used for ROH\_1, ROH\_2, and ROH\_3 in this study. Besides, the inbreeding coefficient was also determined as the sum of SNPs in the ROHs divided by the total number of SNPs, and it was marked  $F_{\text{ROH}(\text{N})}$ . A minimum density of 1 SNP per 80kb was set to prevent low SNP density from affecting ROH length. The formula (Lencz *et al.* 2007; Purfield *et al.* 2012) determined the minimal number of SNPs in an ROH. As a result, both the minimal number of SNPs per ROH and per window were set to 66 (the corresponding PLINK parameters for ROH\_1 are "-homozyg-density 80," "-homozyg-snp 66," and "-homozyg-window-snp 66"). To correct for false-positive ROH caused by LD, ROH\_2 included the stringent criteria for setting the minimum ROH length to 500 kb on the base of ROH\_1. Moreover, the maximal genome coverage is the proportion of the maximal detectable ROH length over the length of the genome and is used to reflect the ROH analysis' validity. To compare the effectiveness of this indicator, we set the minimum density of 1 SNP was set to 70 kb in ROH\_3.

The model-based ROH detection method used RZooRoH. The software implements an efficient and accurate approach based on the hidden Markov model to identify homozygous-by-descent (HBD) segments associated with ROHs. We set a 2-state model

(1R model), which estimated the probability of 2 consecutive markers to be either HBD or non-HBD. The genotyping error rate was set to 0.025%, as suggested by Ferencakovic et al. (2013). Finally,  $F_{ROH(model)}$  was calculated as the proportion of the genome in HBD classes.

The inbreeding coefficients estimated by these methods were compared using Pearson's correlation with the data set of 1,599 pigs with both genotype and pedigree information.

## Estimation of ID

The linear mixed model estimated ID on growth and reproductive traits. ID was estimated separately for AGE and BF using the following bivariate animal model:

$$\begin{bmatrix} \mathbf{y}_1 \\ \mathbf{y}_2 \end{bmatrix} = \begin{bmatrix} \mathbf{X}_1 & 0 \\ 0 & \mathbf{X}_2 \end{bmatrix} \begin{bmatrix} \boldsymbol{\beta}_1 \\ \boldsymbol{\beta}_2 \end{bmatrix} + \begin{bmatrix} \mathbf{f}_1 & 0 \\ 0 & \mathbf{f}_2 \end{bmatrix} \begin{bmatrix} b_1 \\ b_2 \end{bmatrix} + \begin{bmatrix} \mathbf{Z}_1 & 0 \\ 0 & \mathbf{Z}_2 \end{bmatrix} \begin{bmatrix} \boldsymbol{\alpha}_1 \\ \boldsymbol{\alpha}_2 \end{bmatrix} + \begin{bmatrix} \mathbf{W}_1 & 0 \\ 0 & \mathbf{W}_2 \end{bmatrix} \begin{bmatrix} \mathbf{c}_1 \\ \mathbf{c}_2 \end{bmatrix} + \begin{bmatrix} \mathbf{e}_1 \\ \mathbf{e}_2 \end{bmatrix}$$

where the column vectors of observations  $\mathbf{y}_1$  and  $\mathbf{y}_2$  represent data of AGE and BF,  $\boldsymbol{\beta}_1$  and  $\boldsymbol{\beta}_2$  are vectors of fixed effects on 2 traits, including the gender, the strain, the year-season at birth, and the number of alive littermates. Besides the above common,  $\boldsymbol{\beta}_1$  for AGE also includes birth weight as a covariate, and  $\boldsymbol{\beta}_2$  for BF includes birth parity.  $b_1$  and  $b_2$  are the regression coefficients on  $\mathbf{f}_1$  and  $\mathbf{f}_2$ , and they are vectors of inbreeding coefficients for AGE and BF, respectively.  $\boldsymbol{\alpha}_1$  and  $\boldsymbol{\alpha}_2$  are vectors of additive genetic effects for each animal.  $\mathbf{c}_1$  and  $\mathbf{c}_2$  are vectors of common litter environment effects, and  $\mathbf{e}_1$  and  $\mathbf{e}_2$  are vectors of random residuals.  $\mathbf{X}_i$ ,  $\mathbf{Z}_i$ , and  $\mathbf{W}_i$  are the incidence matrices relating records of the  $i$ th trait to fixed effects ( $\boldsymbol{\beta}_i$ ), additive genetic effects ( $\boldsymbol{\alpha}_i$ ), and common litter environment effects ( $\mathbf{c}_i$ ), respectively. Moreover, the (co)variance structure of random effects of this model is as follows:

$$\mathbf{V} \begin{bmatrix} \boldsymbol{\mu}_1 \\ \boldsymbol{\mu}_2 \\ \mathbf{c}_1 \\ \mathbf{c}_2 \\ \mathbf{e}_1 \\ \mathbf{e}_2 \end{bmatrix} = \begin{bmatrix} \mathbf{A}\sigma_{\alpha_1}^2 & \mathbf{A}\sigma_{\alpha_{12}} & 0 & 0 & 0 & 0 \\ \mathbf{A}\sigma_{\alpha_{12}} & \mathbf{A}\sigma_{\alpha_2}^2 & 0 & 0 & 0 & 0 \\ 0 & 0 & \mathbf{I}\sigma_{c_1}^2 & \mathbf{I}\sigma_{c_{12}} & 0 & 0 \\ 0 & 0 & \mathbf{I}\sigma_{c_{12}} & \mathbf{I}\sigma_{c_2}^2 & 0 & 0 \\ 0 & 0 & 0 & 0 & \mathbf{I}\sigma_{e_1}^2 & \mathbf{I}\sigma_{e_{12}} \\ 0 & 0 & 0 & 0 & \mathbf{I}\sigma_{e_{12}} & \mathbf{I}\sigma_{e_2}^2 \end{bmatrix}$$

where  $\mathbf{A}$  is the relationship matrix;  $\sigma_{\alpha_i}^2$  is additive genetic variances for the  $i$ th trait,  $\sigma_{c_i}^2$  and  $\sigma_{e_i}^2$  are variances of common litter environment and residual effects for the  $i$ th trait, respectively;  $\sigma_{\alpha_{12}}$ ,  $\sigma_{c_{12}}$  and  $\sigma_{e_{12}}$  are covariances of additive genetic effects, common litter environment, and residual effects between 2 traits.

In practice, the reproductive traits usually use the repeatability model to estimate breeding value, so we took the different strategies from growth traits to estimate ID on TNB, NBA, and litter weight at birth, as follows:

$$\mathbf{y} = \mathbf{X}\boldsymbol{\beta} + \mathbf{f}\mathbf{b} + \mathbf{Z}\boldsymbol{\alpha} + \mathbf{W}\mathbf{p} + \mathbf{e}$$

where  $\mathbf{y}$  is a vector of observations,  $\boldsymbol{\beta}$  is a vector of fixed effects, including the year-season at birth and parity.  $b$  is the regression coefficient on  $\mathbf{f}$ , which is a vector of inbreeding coefficients.  $\mathbf{X}$  is the incidence matrix relating records to fixed effects ( $\boldsymbol{\beta}$ ).  $\boldsymbol{\alpha}$  is a vector of additive random animal effects distributed with means of zero and variance  $\mathbf{A}\sigma_{\alpha}^2$ ;  $\mathbf{A}$  is the relationship matrix.  $\mathbf{Z}$  is the incidence matrix relating records to additive random animal effects;  $\mathbf{p}$  is a vector of random permanent environmental effects, to which incidence matrix  $\mathbf{W}$  relates records;  $\mathbf{e}$  is a vector

of random residual effects. It is assumed that the permanent environmental effects and residual effects are independently distributed with means of zero and variance  $\mathbf{I}\sigma_p^2$  and  $\mathbf{I}\sigma_e^2$ , respectively.

The statistical analysis was performed with the DMU program package (Madsen and Jensen 2008), and a t-test was used to obtain P-values.

## Results

### ROH and inbreeding coefficient

We used 3 kinds of parameter settings in PLINK and a model-based method in RZooRoH to detect ROHs in a Large White pig population with 1,600 pigs genotyped. The numbers of ROHs were 47,133, 39,529, and 31,721, with an average length of 10,827.20, 12,049.43, and 9,228.63 kb for the 3 rule-based methods for ROH\_1, ROH\_2, and ROH\_3, respectively. RZooRoH detected 208,211 ROH segments with an average of 4,194.77 kb, which was over 4 times the number detected by PLINK. Using PLINK, the length of most ROHs was between 5 and 10 Mb, whereas 78% of homozygous segments were short (less than 5 Mb) using RZooRoH (Supplementary Fig. 1). The distribution of ROH incidence per SNP for ROH\_1 was similar to ROH\_2 (Fig. 1). However, some ROH islands (highly homozygous regions) were ignored for ROH\_3, especially on SSC1, SSC4, and SSC9. Also, Fig. 1 clearly showed that the model-based approach could detect more SNPs in ROHs than the rule-based method.

$F_{PED(total)}$  was estimated from all animals with phenotype and pedigree information, and  $F_{PED}$  was estimated from the animals with genotype and pedigree information. The average  $F_{PED(total)}$  was equal to the average  $F_{PED}$  at 0.01 (see Supplementary Table 1), and the average genomic inbreeding coefficients using different methods varied widely. The average  $F_{PH}$  was  $0.64 \pm 0.02$  ranging from 0.56 to 0.73. While the range of  $F_{HOM(pruned)}$  was smaller after pruning based on LD (Fig. 2), both the average  $F_{GRM}$  and  $F_{HOM}$  were  $-0.01$  no matter whether the data were pruned or not. The average inbreeding coefficients with the rule-based approach were about 0.13, and the standard deviations were 0.03, except for  $F_{ROH3}$ .  $F_{ROH3}$ , with an average of  $0.07 \pm 0.02$ , was lower than the other 2 estimates. The same trends were also observed in detecting ROHs. The average  $F_{ROH(model)}$  was  $0.24 \pm 0.03$  ranging from 0.16 to 0.46, which was higher than other estimates based on ROHs.

Every pair of inbreeding coefficients was considered statistically significant at the 0.01 level. Correlations between the pedigree-based and genomic inbreeding coefficients were weak, ranging from 0.11 to 0.25 (Fig. 3). The highest correlations with  $F_{PED}$  were  $F_{HOM(pruned)}$ ,  $F_{ROH1}$ , and  $F_{ROH2}$  ( $r=0.25$ ), followed by  $F_{ROH(model)}$  ( $r=0.23$ ). The lowest correlation with  $F_{PED}$  was  $F_{GRM1}$  calculated from the loose criterion for MAF (0.01). Except for  $F_{GRM}$ , there were strong correlations between other genomic  $F$ . Although the correlation coefficient between  $F_{HOM}$  and  $F_{HOM(pruned)}$  was relatively lower (just 0.79), the correlations using the same approach and different parameters were strong. Compared with  $F_{HOM(pruned)}$ ,  $F_{HOM}$  had a lower association with  $F_{PED}$  and a higher association with genomic inbreeding estimates. In contrast, the correlation coefficient between  $F_{GRM}$  from pruning data for  $MAF > 0.01$  and  $MAF > 0.05$  was 0.98. Compared to  $F_{GRM1}$  ( $MAF > 0.01$ ),  $F_{GRM2}$  ( $MAF > 0.05$ ) had relatively strong correlations with other genomic inbreeding coefficients. For ROH-based methods, the correlation coefficients among  $F_{ROH1}$ ,  $F_{ROH1(N)}$ , and  $F_{ROH2}$  were around 1. Also,  $F_{ROH(model)}$  using

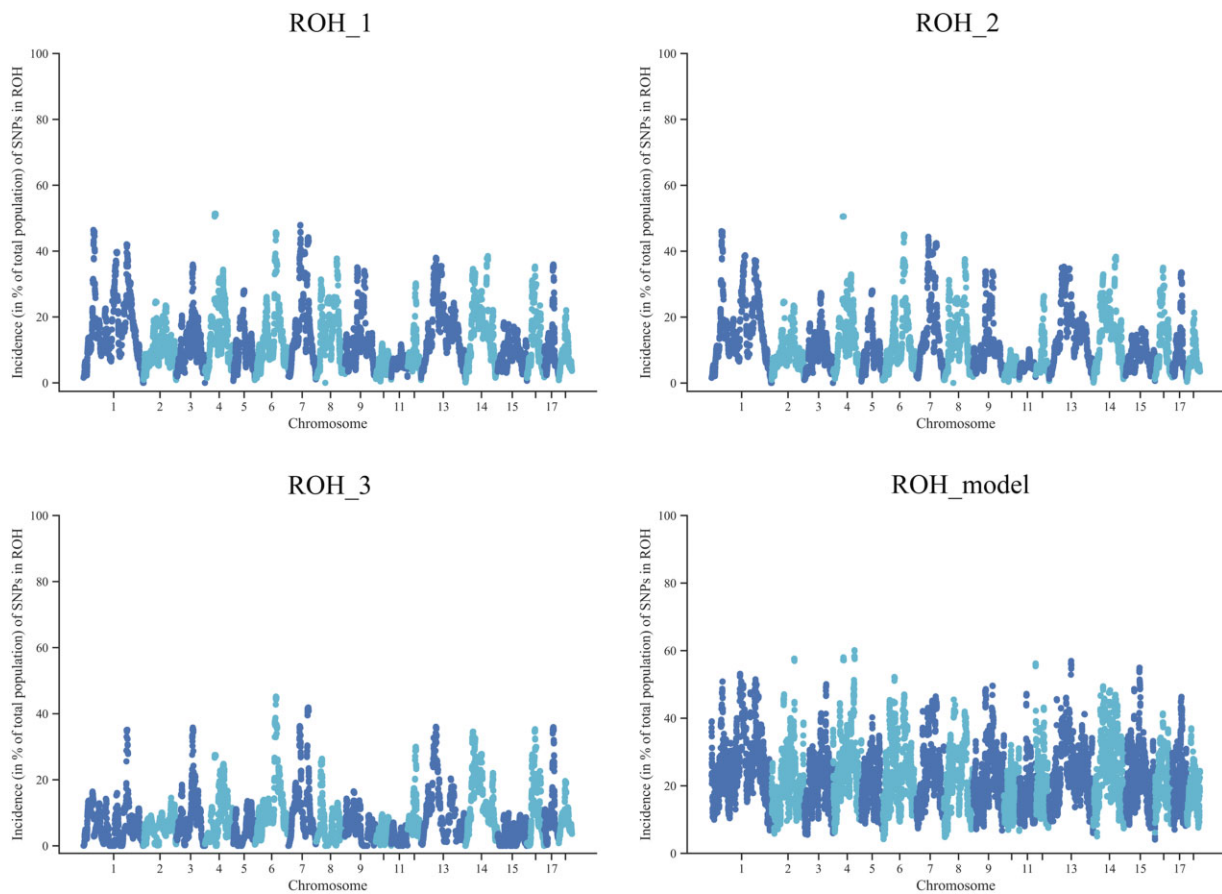

**Fig. 1.** Incidence plots of SNPs in an ROH on chromosomes. The ROH\_1 was based on Meyermans's recommendation. More strict parameters about the length of an ROH (>5 Mb) for ROH\_2 and a minimum density of 1 SNP per ROH (<70/kb) for ROH\_3 were set. ROH\_model used the model-based software RZooRoH.

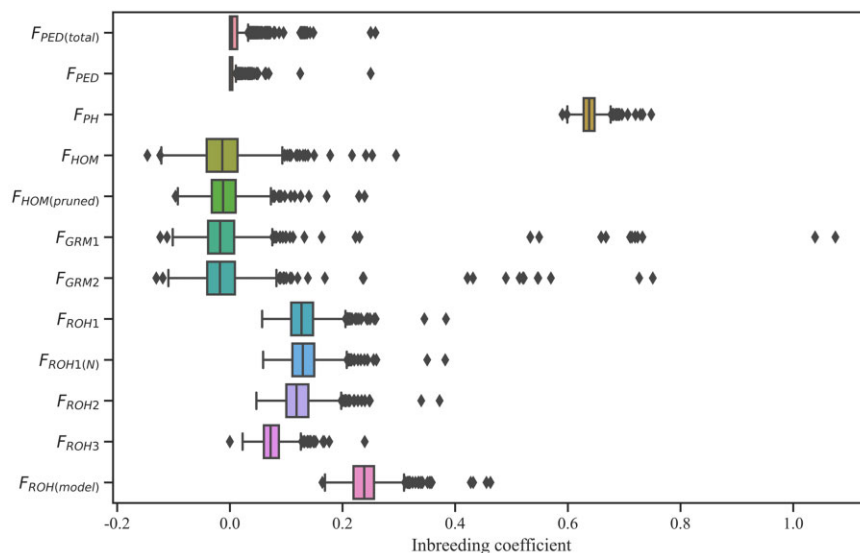

**Fig. 2.** Box plots of inbreeding coefficients estimated with different methods for data sets.  $F_{PED(total)}$  was estimated from the total animals of 27,341, and  $F_{PED}$  included 1,599 animals with both genotype and pedigree information.  $F_{PH}$  = the proportion of homozygous genotypes of all genotypes;  $F_{GRM}$  = inbreeding from genomic relationship matrix,  $F_{GRM1}$  and  $F_{GRM2}$  were from pruning data for MAF (0.01) and MAF (0.05);  $F_{HOM}$  = inbreeding coefficients based on the observed vs expected number of homozygous genotypes,  $F_{HOM(pruned)}$  was from SNP pruned data based on LD; Under the different settings (ROH\_1, ROH\_2, and ROH\_3),  $F_{ROH}$  was estimated based on runs of homozygosity;  $F_{ROH(N)}$  was determined as the sum of SNPs in the ROHs divided by the total number of SNPs;  $F_{ROH(model)}$  was estimated using the model-based software RZooRoH.

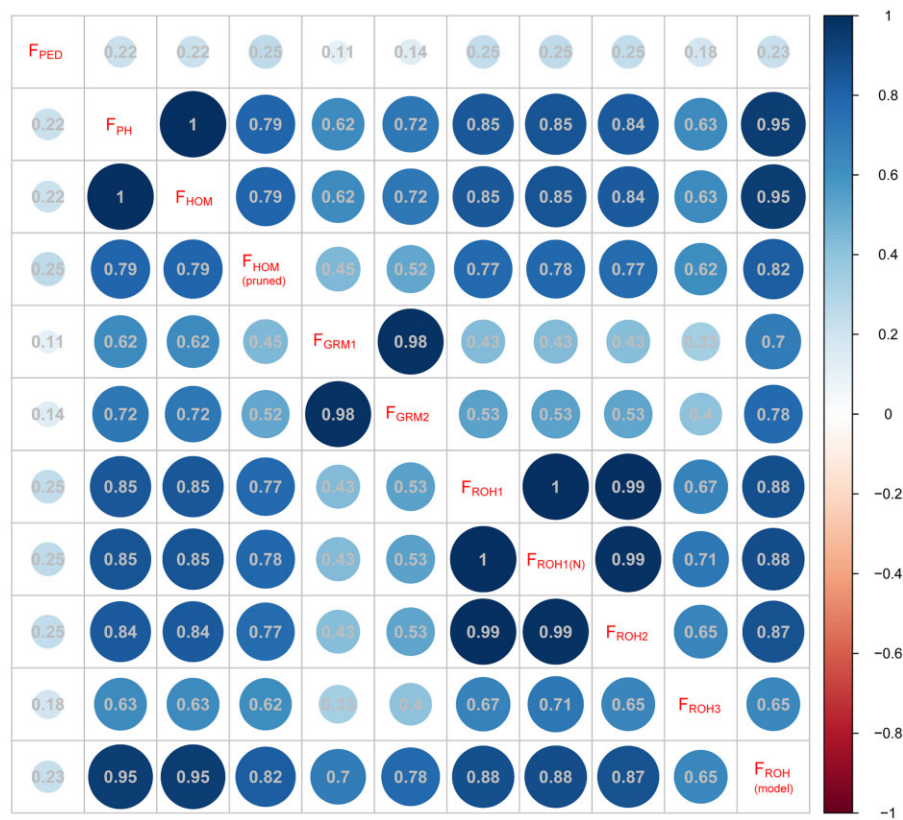

**Fig. 3.** Correlations between different estimates of inbreeding. Every pair of inbreeding coefficients was related significantly ( $P < 0.01$ , Pearson correlation).  $F_{PED}$  only included 1,599 animals with both genotype and pedigree information.  $F_{PH}$  = the proportion of homozygous genotypes of all genotypes;  $F_{GRM}$  = inbreeding from genomic relationship matrix,  $F_{GRM1}$  and  $F_{GRM2}$  were from pruning data for MAF (0.01) and MAF (0.05);  $F_{HOM}$  = inbreeding coefficients based on the observed vs expected number of homozygous genotypes,  $F_{HOM(\text{pruned})}$  was from SNP pruned data based on LD; under the different settings (ROH\_1, ROH\_2, and ROH\_3),  $F_{ROH}$  was estimated based on ROH;  $F_{ROH(N)}$  was determined as the sum of SNPs in the ROHs divided by the total number of SNPs;  $F_{ROH(\text{model})}$  was estimated using the model-based software RZooRoH.

RZooRoH had the highest correlation with other genomic F, followed by  $F_{ROH1}/F_{ROH2}$  and  $F_{ROH3}$ .

## Inbreeding depression

All the results of descriptive statistical analysis of traits and estimates of the ID are shown in the Supplementary materials (Supplementary Tables 2 and 3). When  $F_{PED}$  was used as a covariate in the model, no statistically significant results were obtained. However,  $F_{PED(\text{total})}$  had a statistically significant effect on AGE, with each 10% increase of  $F_{PED(\text{total})}$  extending  $2.6 \pm 0.5$  days. Furthermore, an increase of 10% in  $F_{PH}$ ,  $F_{HOM}$ , and  $F_{GRM1}$  was associated significantly with the extension of AGE by  $3.0 \pm 1.6$ ,  $1.1 \pm 0.6$ , and  $0.8 \pm 0.3$  days, respectively. For  $F_{HOM}$ , LD-based SNP pruning declined the  $P$ -value and increased the estimate of ID on AGE, and there was a similar trend using the strict criteria (MAF  $< 0.05$ ,  $F_{GRM2}$ ). An increase of 10% in  $F_{ROH(\text{model})}$  caused the extension of AGE by  $1.8 \pm 0.8$  days, while not all inbreeding coefficients using ROH-based measures had a significant ID effect, such as  $F_{ROH1}$ . From the error bar plot (Fig. 4), it was evident that the maximum estimates of ID on AGE for  $F_{HOM}$ ,  $F_{GRM1}$ , and  $F_{GRM2}$  were lower than the minimum estimate in  $F_{PED(\text{total})}$ . The estimates of ID on AGE with  $F_{PH}$ ,  $F_{ROH(\text{model})}$ , and  $F_{HOM(\text{pruned})}$  were close to the result for  $F_{PED(\text{total})}$ . Nevertheless, compared to the other 2 methods, the disadvantage with  $F_{PH}$  was a relatively large standard error of estimates. All pedigree-based and genomic inbreeding coefficients were hardly associated significantly with back-fat thickness. As a result, the error bar plot of estimates for BF was not shown in Fig. 4.

$F_{PED(\text{total})}$  significantly affected TNB and NBA, which is different from  $F_{PED}$ . For litter weight at birth, there was no ID effect for both  $F_{PED}$  and  $F_{PED(\text{total})}$ . An increase of 10% in  $F_{PED(\text{total})}$  contributed to a decrease of  $0.5 \pm 0.2$  piglets both for TNB and NBA. Most genomic inbreeding coefficients significantly affected 3 reproductive traits. Specifically, the corresponding estimates of ID on TNB, NBA, and litter weight at birth were  $1.4 \pm 0.4$  piglets,  $1.3 \pm 0.4$  piglets, and  $1.7 \pm 0.5$  kg, with a 10% increase in  $F_{PH}$ . Moreover, the maximum estimate with  $F_{PH}$  was much lower than the minimum estimate with  $F_{PED(\text{total})}$  (Fig. 4). The estimates of ID with  $F_{HOM}$  and  $F_{GRM1}$  were similar, with approximately 0.5 piglets, 0.5 piglets, and 0.6 kg, with a 10% increase. The result differing from ID on AGE was that SNP pruning resulted in a higher  $P$ -value of ID on 3 reproductive traits and a lower absolute value. Besides, the estimates with  $F_{GRM1}$  and  $F_{GRM2}$  were very close, of which the difference is less than 0.32. Both  $F_{ROH1}$  and  $F_{ROH(\text{model})}$  had significant effects on reproductive traits, and corresponding estimates were about 0.6 piglets (TNB), 0.6 piglets (NBA), and 0.7 kg (litter weight at birth), respectively.

## Discussion

### ROH and inbreeding coefficient

When the minimal number of SNPs per ROH was set to 66, calculated by Lencz's formula, short ROHs ( $< 5$  Mb) had little effect on the detection of genome regions with ROH hotspots overlapping and estimates of inbreeding ( $r = 0.99$ ). However, the long homozygous regions in the genome might be ignored with strict criteria

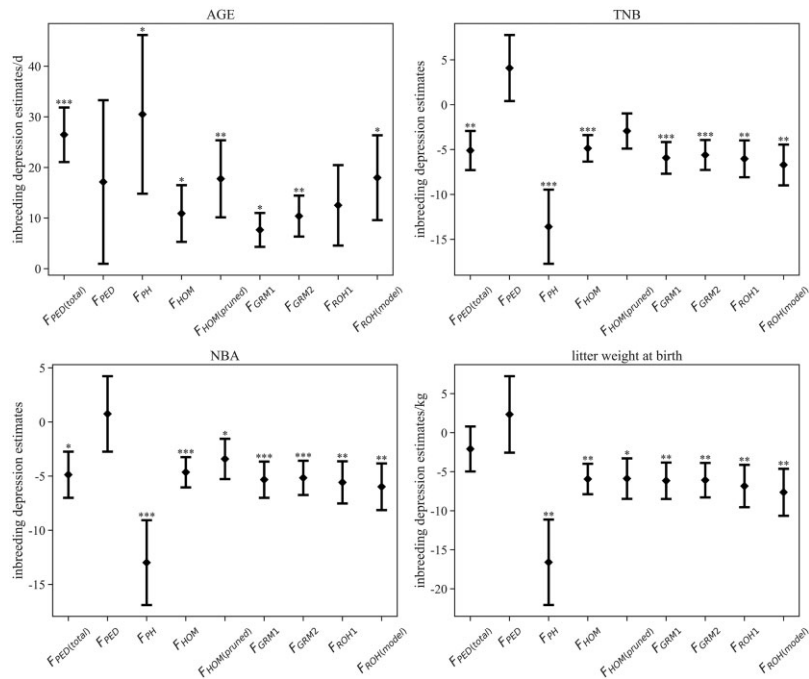

**Fig. 4.** Estimates of ID on growth and reproductive traits using different methods (error bar refers to the standard error). \*P-value < 0.05, \*\*P-value < 0.01, \*\*\*P-value < 0.001 ID with  $F_{PED(totals)}$  were estimated from the total animals with pedigree information, and  $F_{PED}$  only included animals with both genotype and pedigree information.  $F_{PH}$  = the proportion of homozygous genotypes of all genotypes;  $F_{GRM}$  = inbreeding from genomic relationship matrix,  $F_{GRM1}$  and  $F_{GRM2}$  were from pruning data for MAF (0.01) and MAF (0.05);  $F_{HOM}$  = inbreeding coefficients based on the observed vs expected number of homozygous genotypes,  $F_{HOM(pruned)}$  was from SNP pruned data based on LD; For  $ROH_1$ ,  $F_{ROH}$  was estimated based on runs of homozygosity;  $F_{ROH(model)}$  was estimated using the model-based software RZooRoH.

of minimal density ( $ROH_3$ ). Combined with the distribution of ROHs on chromosomes (Supplementary Fig. 2), it was evident that 2 ROH hotspots for  $ROH_2$  were absent for  $ROH_3$ , located on SSC1 (the position from 48.5 to 54.8 Mb) and SSC4 (the position from 48.2 to 53.4 Mb), respectively. The same gene region on SSC4 was also detected in pig populations of Poland (Szmatoła et al. 2020). Furthermore, gene enrichment analysis indicated that the genes on 2 ROH hotspots are primarily associated with metabolic process and lyase activity. Moreover, some genes, such as *NT5E*, *COL9A1*, *LMBRD1*, *CA3*, *ATP6V0D2*, and *SLC7A13*, were associated with the absorption and metabolism of nutrients.

The average pedigree-based inbreeding coefficient with an average depth of 8.2 generations was small, and there were weak correlations between  $F_{PED}$  and other genomic F in agreement with the study of Shi et al. (2020). In addition, the average  $F_{PH}$  was near to the study for Large White pigs (Zanella et al. 2016), and the averages of  $F_{GRM}$  and  $F_{HOM}$  were negative. The correlation between  $F_{PED}$  and  $F_{GRM}$  was only 0.11, which is consistent with local pigs of northern Germany (Schäler et al. 2020) and Simmental cattle (Marras et al. 2015). It was reported that correlations between  $F_{GRM}$  and other genomic F were lower than that among other genomic F (Mastrangelo et al. 2016; Schäler et al. 2020). Our study also confirmed this point. Because there was no definite criterion to judge the most suitable method representing the actual inbreeding level of a population, the method having a relatively high association with both pedigree-based and most genomic methods was considered a good estimator. It should be noted that the highest correlations with  $F_{PED}$  were  $F_{HOM}$  after SNP pruning based on LD ( $F_{HOM(pruned)}$ ) and  $F_{ROH}$ . When SNP pruning had a significant impact on estimating inbreeding, the disadvantage of  $F_{HOM(pruned)}$  was a lack of guidelines on the applicability of SNP-pruning parameters. However, according to the practical guide to

ROH analysis offered by Meyermans et al. (2020), it is easy to choose a proper parameter to estimate  $F_{ROH}$ . Moreover, the correlation coefficients of most ROH-based methods with other genomic methods were high, especially  $F_{ROH(model)}$ . These results suggested that  $F_{ROH}$  had a distinct advantage in estimating the level of inbreeding under appropriate parameter settings or using the model.

The  $F_{ROH}$  was obtained by 2 computing methods, based on the number of SNPs in ROH and the length of ROHs, both used in previous literature (Pryce et al. 2014; Sams and Boyko 2019). The high correlation between  $F_{ROH1}$  and  $F_{ROH(N)}$  ( $r = 1$ ) indicated that the 2 methods tended to be the same. Although the minimal density was recommended to 70 kb/SNP ( $ROH_3$ ) by Meyermans et al. (2020), it also mentioned that the maximal genome coverage was a necessary validator in ROH analysis. In this study, this validator for  $ROH_3$  was just 61.37%. When a looser standard with 80 kb/SNP ( $ROH_1$  and  $ROH_2$ ) was used, the maximal genome coverage was 99.7%. The low maximal genome coverage also caused the poor performance. Besides a low correlation with  $F_{ROH1}$  ( $r = 0.67$ ),  $F_{ROH3}$  correlated poorly with F using other measures. It suggested that genome coverage was essential to estimating the level of inbreeding. The inbreeding coefficient of the model-based approach (RZooRoH) correlated with the estimates of the rule-based approach ( $r = 0.65-0.88$ ), but its correlations with  $F_{PH}$  and  $F_{HOM}$  were higher. This result was probably because the rule-based approach ignored some short ROHs less than 5 Mb in length, which could be misidentified as identity by state.

### Inbreeding depression

We could observe the statistically significant ID associated with pedigree-based inbreeding coefficients from 27,341 animals, but not when intersection with phenotypes and genotypes was

calculated. For AGE, TNB, and NBA, a 10% increase in  $F_{\text{PED}(\text{total})}$  led to adverse effects of  $2.6 \pm 0.5$  days,  $0.5 \pm 0.2$  piglets, and  $0.5 \pm 0.2$  piglets. These estimates for TNB and NBA were higher than that in Iberian pigs (Saura et al. 2015). In addition,  $F_{\text{PED}(\text{total})}$  had no effect on BF and litter weight at birth. Although a small dataset was not conducive to estimating ID, genomic measures had a good performance without an amount of information.

Compared with  $F_{\text{PED}(\text{total})}$ , using  $F_{\text{PH}}$  generated a relatively large standard error and might overestimate ID on both growth and reproduction traits. For AGE, the estimates of ID, with  $F_{\text{GRM}}$  for strict MAF criterion ( $\text{MAF} < 0.05$ ) and  $F_{\text{HOM}}$  after SNP pruning based on LD, had more power. Because the loose criterion of MAF and no SNP pruning contributed to overestimating the inbreeding of certain animals, ID was finally underestimated. If  $F$  derived from the genomic relationship matrix is used to estimate ID on growth traits, the MAF should be set to 0.05 instead of 0.01. In addition, the estimate of ID on AGE with  $F_{\text{ROH}(\text{model})}$  was higher than with  $F_{\text{GRM}2}$  and near to  $F_{\text{HOM}(\text{pruned})}$ . However,  $F_{\text{ROH}1}$  had no significant effect on AGE. While there is no obvious evidence that model-based  $F_{\text{ROH}}$  is the best method of ID on AGE among SNP-based methods, the difference between  $F_{\text{ROH}(\text{model})}$  and  $F_{\text{PED}(\text{total})}$  is comparatively small.

The estimates of ID on reproductive traits among various genomic methods were much closer than estimates on growth traits, except for  $F_{\text{HOM}(\text{pruned})}$  and  $F_{\text{PH}}$ . The results of ID using  $F_{\text{GRM}}$  and all ROH-based  $F$  estimating for TNB and NBA were similar to studies in Iberian pigs (Saura et al. 2015; Silió et al. 2016) and lines from Genus PIC (Varona et al. 2018). Using  $F_{\text{PH}}$  was more likely to be overestimated ID on reproductive traits, while using  $F_{\text{HOM}(\text{pruned})}$  may underestimate it. Only SNP-based  $F$  revealed a strong association with ID on litter weight at birth, ranging from 0.5 to 0.8 kg per 10% increase. In contrast with AGE, ID on reproductive traits with SNP-based  $F$  had a lower  $P$ -value than pedigree-based  $F$ . There were many reasons for these differences, such as errors in pedigree records, expected or actual IBD, and the number of samples. Anyhow, both our study and studies in dairy cattle (Pryce et al. 2014; Martikainen et al. 2017) found that the use of pedigree information might underestimate ID on female fertility.

In summary, we found pedigree-based and SNP-based measures had significant effects on AGE, TNB, and NBA, except for BF. Especially in terms of litter weight at birth, only SNP-based  $F$  revealed a strong association with ID. The estimate of ID in  $F_{\text{PED}}$  was susceptible to the number of samples, but the genomic method had a better performance with a smaller data set. Most genomic methods tended to provide a more similar estimation of ID on reproductive traits than growth traits. From the practical point of view, the method based on the hidden Markov model (RZooRoH) did not need to worry about the impact of parameters and performed well on both AGE and reproductive traits in the estimate of inbreeding and ID. These findings might improve the extensive application of ROH analysis in pig breeding and breed conservation.

## Data availability

Supplementary File 1 contains a list of all supplemental files. Supplementary File 2 contains supplemental files, figures, and tables. Supplementary Files 3 and 4 contain phenotype information of growth traits and reproductive traits for Large White pigs, respectively. In addition, Supplementary File 5 contains the pedigree of Large White pigs in this study. Supplementary Files 6 and 7 contain genotype and maker location information in PLINK

.ped/map formation for Large White pigs. Supplementary material is available at figshare (<https://doi.org/10.25387/g3.17207063>).

## Funding

This study was funded by the National Natural Science Foundation of China (NSFC) under grants Nos. 31661143013, 31790414 and 31972563, and China Agriculture Research System (No. CARS-35-01A).

## Conflicts of interest

No potential conflict of interest was reported by the authors.

## Literature cited

- Bertrand AR, Kadri NK, Flori L, Gautier M, Druet T. Rzooroh: an R package to characterize individual genomic autozygosity and identify homozygous-by-descent segments. *Methods Ecol Evol.* 2019;10(6):860–866.
- Bijlsma R, Loeschcke V. Genetic erosion impedes adaptive responses to stressful environments. *Evol Appl.* 2012;5(2):117–129.
- Casellas J, Ibáñez-Escriche N, Varona L, Rosas JP, Noguera JL. Inbreeding depression load for litter size in Entrepelado and Retinto Iberian pig varieties. *J Anim Sci.* 2019;97(5):1979–1986.
- Charlesworth D, Willis JH. Fundamental concepts in genetics the genetics of inbreeding depression. *Nat Rev Genet.* 2009;10(11):783–796.
- Coster A. Pedigree: Pedigree Functions. R package version 1.4. 2012. Available from: <http://CRAN.R-project.org/package=pedigree>
- Doekes HP, Bijma P, Windig JJ. How depressing is inbreeding? A meta-analysis of 30 years of research on the effects of inbreeding in livestock. *Genes (Basel).* 2021;12(6):926.
- Falconer DS, Mackay TFC. *Introduction to Quantitative Genetics.* Essex (UK): Longman; 1996.
- Farkas J, Curik I, Csató L, Csörnyei Z, Baumung R, Nagy I. Bayesian inference of inbreeding effects on litter size and gestation length in Hungarian landrace and Hungarian large white pigs. *Livest Sci.* 2007;112(1–2):109–114.
- Ferencakovic M, Solkner J, Curik I. Estimating autozygosity from high-throughput information: effects of SNP density and genotyping errors. *Genet Sel Evol.* 2013;45(1):42.
- González-Diéguez D, Tusell L, Carillier-Jacquín C, Bouquet A, Vitezica ZG. SNP-based mate allocation strategies to maximize total genetic value in pigs. *Genet Sel Evol.* 2019;51(1):55.
- Gowrimanokari KV, Thiagarajan R, Venkataramanan R, Gopi H. Effect of inbreeding on pre-weaning and sow performance traits in large white Yorkshire pigs. *Indian J Ani Res.* 2019;53(8):997–1001.
- Gutierrez-Reinoso MA, Aponte PM, Cabezas J, Rodriguez-Alvarez L, Garcia-Herreros M. Genomic evaluation of primiparous high-producing dairy cows: inbreeding effects on genotypic and phenotypic production-reproductive traits. *Animals (Basel).* 2020;10(9):1704.
- Hill WG. Variation in genetic identity within kinships. *Heredity.* 1993;71(6):652–653.
- Holyoake PK, Stevenson J, Moran C, Stokes R, Kirk EP, Sugo E, Hawthorne WJ. The occurrence of congenital heart defects in an inbred herd of pigs in Australia. *Aust Vet J.* 2006;84(4):129–133.
- Kim YS, Cho K-H, Lee MJ, Kim JA, Cho ES, Hong JK. Effects of inbreeding depression on litter size of Korean native pig. *J Korea Acad Ind Cooperation Soc.* 2019;20(6):514–520.

- Lencz T, Lambert C, DeRosse P, Burdick KE, Morgan TV, Kane JM, Kucherlapati R, Malhotra AK. Runs of homozygosity reveal highly penetrant recessive loci in schizophrenia. *Proc Natl Acad Sci USA*. 2007;104(50):19942–19947.
- Leutenegger AL, Prum B, Genin E, Verny C, Lemainque A, Clerget-Darpoux F, Thompson EA. Estimation of the inbreeding coefficient through use of genomic data. *Am J Hum Genet*. 2003;73(3):516–523.
- Madsen P, Jensen J. A User's Guide to DMU: A Package for Analyzing Multivariate Mixed Models, Version 6. 2008. Available from: <https://dmu.ghpc.au.dk/dmu/>
- Markus S, Posta J, Bogner L, Komlosi I. Inbreeding of the Hungarian Holstein-Friesian population. *Allattenyesztes es Takarmanyozas*. 2013;62(1):52–56.
- Marras G, Gaspa G, Sorbolini S, Dimauro C, Ajmone-Marsan P, Valentini A, Williams JL, Macciotta NPP. Analysis of runs of homozygosity and their relationship with inbreeding in five cattle breeds farmed in Italy. *Anim Genet*. 2015;46(2):110–121.
- Martikainen K, Tyriseva AM, Matilainen K, Poso J, Uimari P. Estimation of inbreeding depression on female fertility in the Finnish Ayrshire population. *J Anim Breed Genet*. 2017;134(5):383–392.
- Mastrangelo S, Tolone M, Di Gerlando R, Fontanesi L, Sardina MT, Portolano B. Genomic inbreeding estimation in small populations: evaluation of runs of homozygosity in three local dairy cattle breeds. *Animal*. 2016;10(5):746–754.
- McQuillan R, Leutenegger A-L, Abdel-Rahman R, Franklin CS, Pericic M, Barac-Lauc L, Smolej-Narancic N, Janicijevic B, Polasek O, Tenesa A, et al. Runs of homozygosity in European populations. *Am J Hum Genet*. 2008;83(5):658.
- Meyermans R, Gorssen W, Buys N, Janssens S. How to study runs of homozygosity using plink? A guide for analyzing medium density SNP data in livestock and pet species. *BMC Genomics*. 2020;21(1):94.
- Pryce JE, Haile-Mariam M, Goddard ME, Hayes BJ. Identification of genomic regions associated with inbreeding depression in Holstein and Jersey dairy cattle. *Genet Sel Evol*. 2014;46(1):71.
- Purcell S, Neale B, Todd-Brown K, Thomas L, Ferreira MAR, Bender D, Maller J, Sklar P, de Bakker PIW, Daly MJ, et al. Plink: a tool set for whole-genome association and population-based linkage analyses. *Am J Hum Genet*. 2007;81(3):559–575.
- Purfield DC, Berry DP, McParland S, Bradley DG. Runs of homozygosity and population history in cattle. *BMC Genet*. 2012;13(1):70.
- Sams AJ, Boyko AR. Fine-scale resolution of runs of homozygosity reveal patterns of inbreeding and substantial overlap with recessive disease genotypes in domestic dogs. *G3 (Bethesda)*. 2019;9(1):117–123.
- Saura M, Fernandez A, Varona L, Fernandez AI, de Cara MAR, Barragan C, Villanueva B. Detecting inbreeding depression for reproductive traits in Iberian pigs using genome-wide data. *Genet Sel Evol*. 2015;47(1):1.
- Schäler J, Krüger B, Thaller G, Hinrichs D. Comparison of ancestral, partial, and genomic inbreeding in a local pig breed to achieve genetic diversity. *Conserv Genet Resour*. 2020;12(1):77–86.
- Shi L, Wang L, Liu J, Deng T, Yan H, Zhang L, Liu X, Gao H, Hou X, Wang L. Estimation of inbreeding and identification of regions under heavy selection based on runs of homozygosity in a large white pig population. *J Anim Sci Biotechnol*. 2020;11:46.
- Silió L, Barragan C, Fernandez AI, Garcia-Casco J, Rodríguez MC. Assessing effective population size, coancestry and inbreeding effects on litter size using the pedigree and SNP data in closed lines of the Iberian pig breed. *J Anim Breed Genet*. 2016;133(2):145–154.
- Silió L, Rodríguez MC, Fernández A, Barragán C, Benítez R, Óvilo C, Fernández AI. Measuring inbreeding and inbreeding depression on pig growth from pedigree or SNP-derived metrics. *J Anim Breed Genet*. 2013;130(5):349–360.
- Szmatola T, Jasielczuk I, Semik-Gurgul E, Szyndler-Nędzka M, Blicharski T, Szulc K, Skrzypczak E, Gurgul A. Detection of runs of homozygosity in conserved and commercial pig breeds in Poland. *J Anim Breed Genet*. 2020;137(6):571–580.
- Ugnivenko AN. Effect of inbreeding on Ukrainian beef breed. *Ukr J Ecol*. 2018;8(1):596–600.
- Varona L, Legarra A, Herring W, Vitezica ZG. Genomic selection models for directional dominance: an example for litter size in pigs. *Genet Sel Evol*. 2018;50(1):1.
- Vigh Z, Gyovai P, Csato L, Bokor A, Farkas J, Radnoczi L, Komlosi I, Nagy I. Effect of inbreeding on lean meat percentage and average daily gain in Hungarian landrace pigs. *Arch Anim Breed*. 2008;51(6):541–548.
- Vitezica ZG, Reverter A, Herring W, Legarra A. Dominance and epistatic genetic variances for litter size in pigs using genomic models. *Genet Sel Evol*. 2018;50(1):71.
- Wang J. Pedigrees or markers: which are better in estimating relatedness and inbreeding coefficient? *Theor Popul Biol*. 2016;107:4–13.
- Xiang T, Christensen OF, Vitezica ZG, Legarra A. Genomic evaluation by including dominance effects and inbreeding depression for purebred and crossbred performance with an application in pigs. *Genet Sel Evol*. 2016;48(1):92.
- Yang J, Benyamin B, McEvoy BP, Gordon S, Henders AK, Nyholt DR, Madden PA, Heath AC, Martin NG, Montgomery GW, et al. Common SNPs explain a large proportion of the heritability for human height. *Nat Genet*. 2010;42(7):565–569.
- Yang J, Lee SH, Goddard ME, Visscher PM. GCTA: a tool for genome-wide complex trait analysis. *Am J Hum Genet*. 2011;88(1):76–82.
- Zanella R, Peixoto JO, Cardoso FF, Cardoso LL, Biegelmeyer P, Cantão ME, Otaviano A, Freitas MS, Caetano AR, Ledur MC. Genetic diversity analysis of two commercial breeds of pigs using genomic and pedigree data. *Genet Sel Evol*. 2016;48(1):24.
- Zhang Q, Calus MP, Guldbandsen B, Lund MS, Sahana G. Estimation of inbreeding using pedigree, 50k SNP chip genotypes and full sequence data in three cattle breeds. *BMC Genet*. 2015;16(1):88.

Communicating editor: D.-J. de Koning
